# Supplementary figures and images for: Multidrug Resistance Like Protein 1 Activity in Malpighian Tubules Regulates Lipid Homeostasis in Drosophila
Source: MDPI journal article supplement (doi:10.3390/membranes11060432), 2021-06-08

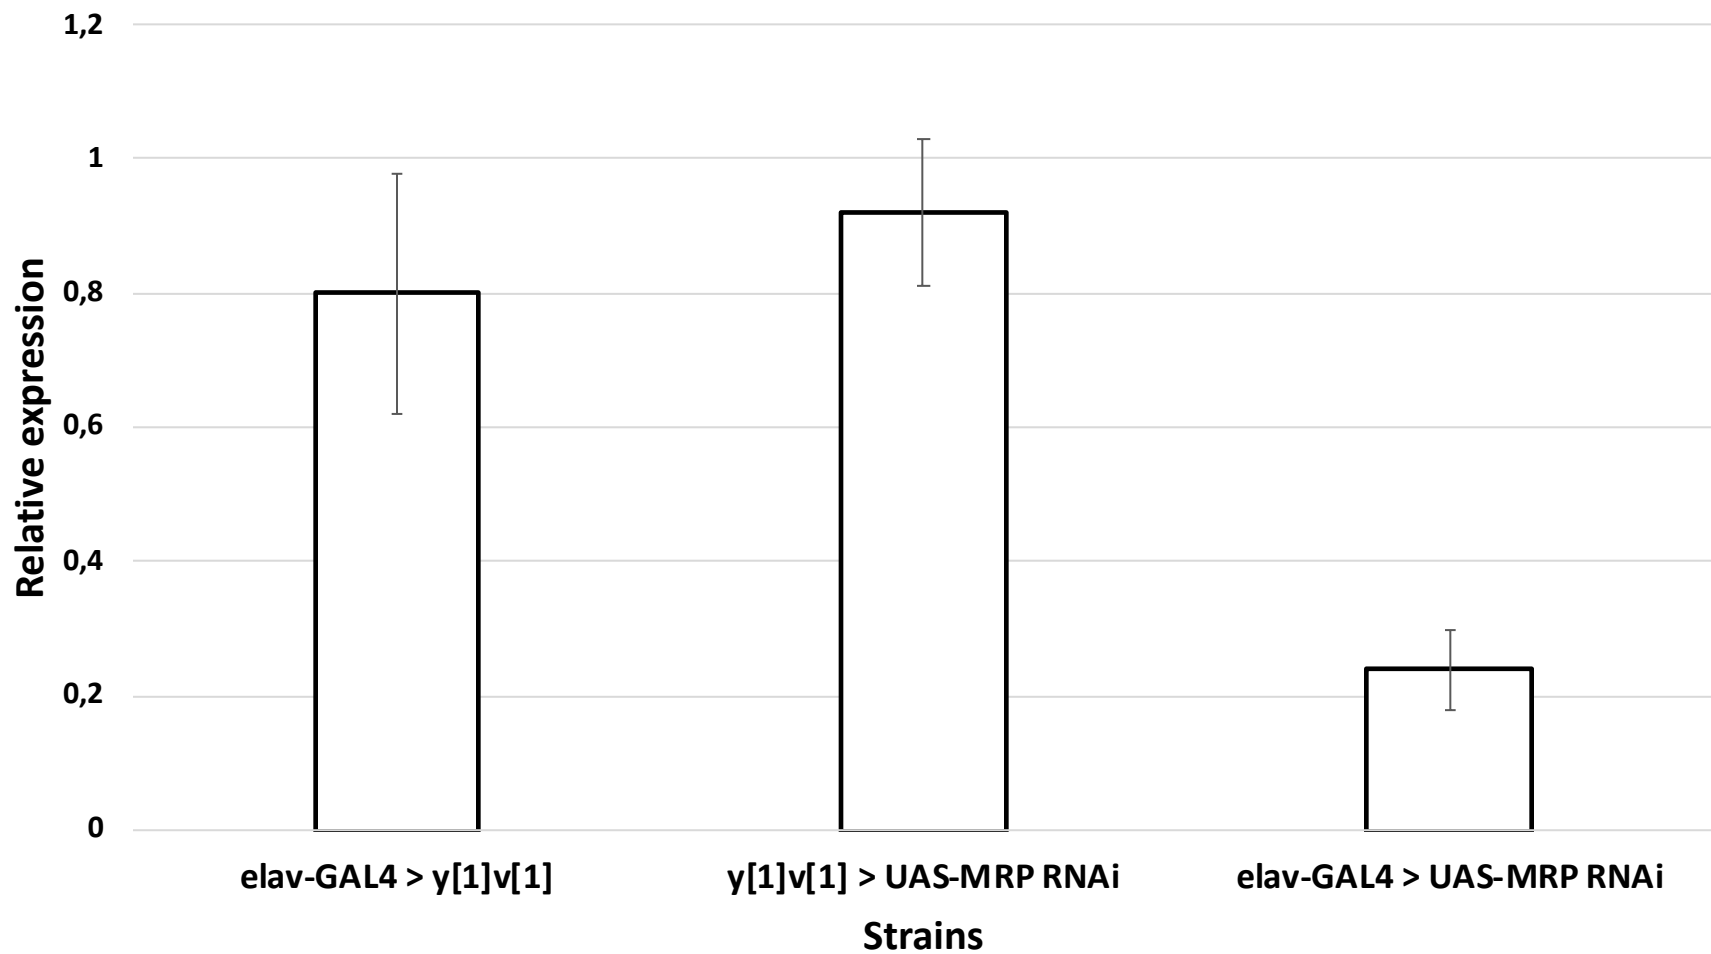

Supplement: s1 [file s1]
